# Supplementary material for: Both thyroid hormone levels and resting metabolic rate decrease in African striped mice when food availability decreases
Source: Oxford University Press journal article supplement (doi:10.1242/jeb.151449), 2016-01-01
Supplement: jeb151449supp.pdf [file jeb151449supp.pdf]

**Table S1. Relationship between RMR and T<sub>3</sub> levels.** Linear Mixed Model examining the relationship between mass-adjusted RMR (ml O<sub>2</sub> g<sup>-1</sup>h<sup>-1</sup>, log-transformed) and T<sub>3</sub> levels (pmol L<sup>-1</sup>). The model controlled for random intercepts of individual ID and group ID. R<sup>2</sup> conditional is given for the model. Significant contrasts are given in bold.

| <b>R<sup>2</sup> = 0.98</b> | Estimate | SE    | t      | P <sub>MCMC</sub> |
|-----------------------------|----------|-------|--------|-------------------|
| Intercept                   | 0.729    | 0.114 | 6.379  | <b>0.0188</b>     |
| T <sub>3</sub>              | -0.237   | 0.026 | -9.021 | <b>0.0084</b>     |
| Season                      | 0.435    | 0.062 | 6.989  | <b>0.0001</b>     |
| Sex                         | -0.116   | 0.076 | -1.532 | 0.1096            |

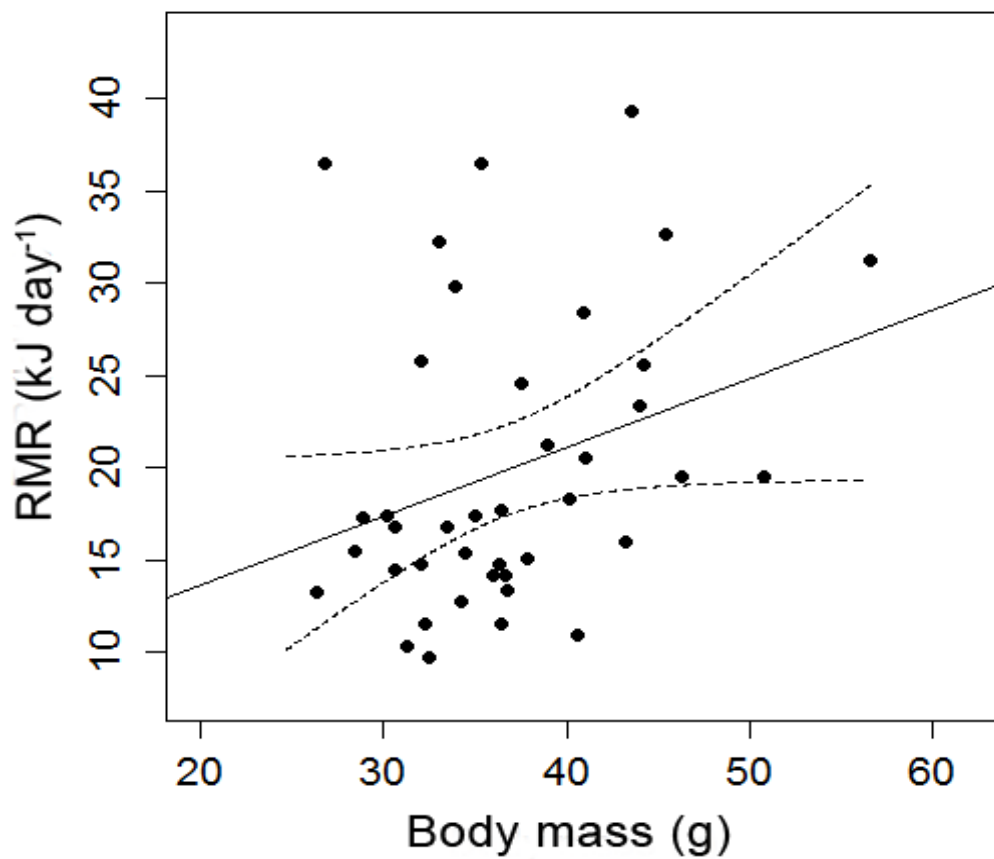

**Fig. S1. Relationship between body mass and whole-animal RMR.** The linear regression line ( $y = 6.17x + 0.37$ ;  $R^2 = 0.06$ ,  $P = 0.048$ ) is shown and dashed lines indicate the 95% c.i.

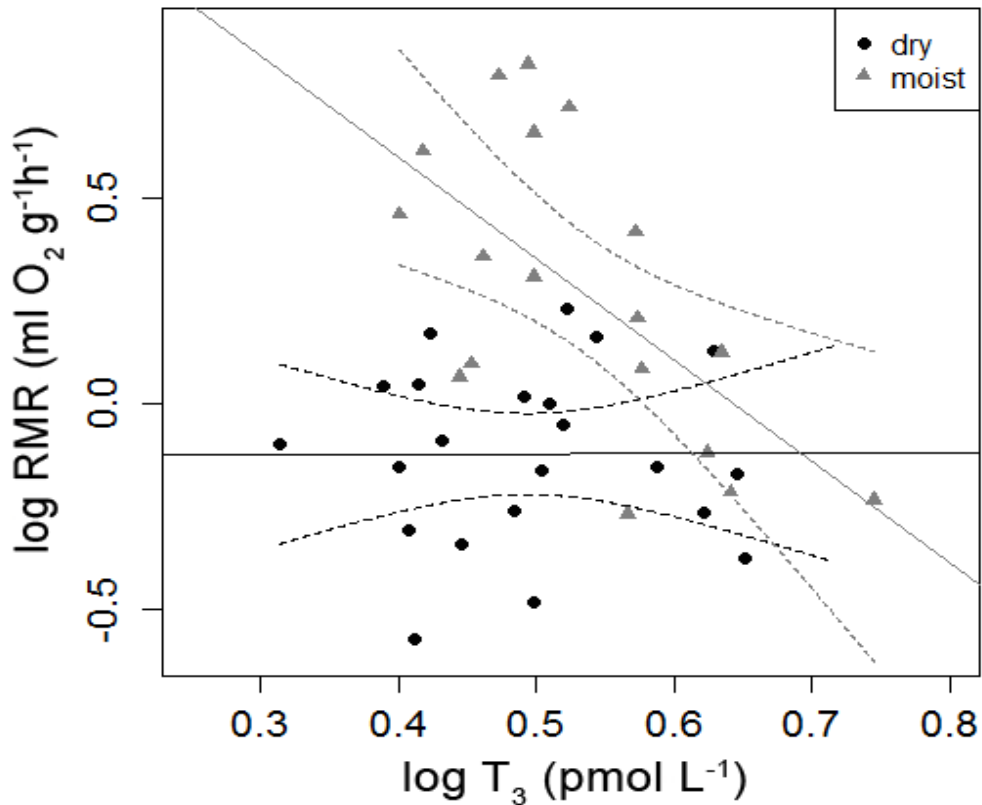

**Fig. S2. Relationship between log-transformed T<sub>3</sub> levels and log-transformed mass-adjusted RMR in the dry season (filled circles) and moist season (grey triangles).** Linear regression lines ( $y = -0.12x + 0.001$ ;  $R^2 = -0.05$ ,  $P = 0.99$ ; moist season:  $y = -1.58x - 1.06$ ;  $R^2 = 0.38$ ,  $P = 0.005$ ) are shown as continuous lines, and dashed lines indicate the 95% c.i.
